# Supplementary material for: Incidence of Hospitalisation and Emergency Department Visits for Pneumococcal Disease in Children, Adolescents, and Adults in Liguria, Italy: A Retrospective Analysis from 2012–2018
Source: MDPI journal article supplement (doi:10.3390/vaccines10091375), 2022-08-24
Supplement: s1 [file s1]

**Incidence of Hospitalisation and Emergency Department  
Visits for Pneumococcal Disease in Children, Adolescents,  
and Adults in Liguria, Italy:  
A Retrospective Analysis From 2012–2018**

**Matteo Astengo<sup>1,\*</sup>, Chiara Paganino<sup>1</sup>, Daniela Amicizia<sup>1,2</sup>, Laura Sticchi<sup>2,3</sup>,  
Andrea Orsi<sup>2,3</sup>, Giancarlo Icardi<sup>2,3</sup>, Maria Francesca Piazza<sup>1</sup>, Salini Mohanty<sup>4</sup>,  
Francesca Senese<sup>5</sup>, Gian Marco Prandi<sup>5</sup>, Filippo Ansaldi<sup>1,2</sup>**

<sup>1</sup> Regional Health Agency of Liguria (ALiSa), Genoa, Italy

<sup>2</sup> Department of Health's Science (DiSSal), University of Genoa, Genoa, Italy

<sup>3</sup> Hygiene Unit, San Martino Policlinico Hospital-IRCCS for Oncology and  
Neurosciences, 16132 Genoa, Italy.

<sup>4</sup>Merck & Co., Inc., Rahway, New Jersey, USA; <sup>5</sup>MSD Italy, Via Vitorchiano 151,  
00189 Rome, Italy.

**\*Correspondence:**

Matteo Astengo

Regional Health Agency of Liguria (ALiSa), Genoa, Italy

Piazza della Vittoria 15, 16121 Genoa Italy.

Tel: +39 0105488257

E-mail: Matteo.astengo@regione.liguria.it

**Table S1.** Search terms and diagnoses of IPD and pneumonia used to identify episodes all patients in Liguria, Italy (2012–2018)

| Diagnosis                            | Description                                                                                        | ICD-9-CM codes                                        |
|--------------------------------------|----------------------------------------------------------------------------------------------------|-------------------------------------------------------|
|                                      | Pneumococcal pneumonia                                                                             | 481                                                   |
| Pneumonia (specified or all-cause)   | Pneumococcal infection and bacterial pneumonia, bronchopneumonia or organism unspecified pneumonia | 041.2 and 482.9, 485, or 486                          |
|                                      | Viral pneumonia                                                                                    | 480.0-480.3, 480.8, or 480.9                          |
|                                      | Pneumonia due to other specified organism                                                          | 483.0, 483.1, or 483.8                                |
| Pneumonia (all-cause)                | Pneumonia in infectious diseases classified elsewhere                                              | 484.1, 484.3, or 484.5-484.8                          |
|                                      | Influenza with pneumonia                                                                           | 487.0                                                 |
| Pneumonia (unspecified or all-cause) | Unspecified bacterial pneumonia, bronchopneumonia or pneumonia                                     | 482.9, 485, or 486                                    |
|                                      | Pneumococcal septicaemia                                                                           | 038.2                                                 |
|                                      | Pneumococcal infection and bacteraemia or septicaemia                                              | 041.2 and 790.7, 038.9, or 038.0                      |
|                                      | Pneumococcal meningitis                                                                            | 320.1                                                 |
|                                      | Pneumococcal infection and meningitis                                                              | 041.2 and 320.2, 320.82, 320.9, or 322.9              |
|                                      | Pneumococcal infection and empyema or pleural effusion                                             | 041.2 and 510.9, 511.1, or 511.9                      |
| IPD                                  |                                                                                                    | 038.2                                                 |
|                                      | Bacteraemic pneumonia: pneumococcal-specific                                                       | 038.0 and 041.2<br>038.9 and 041.2<br>790.7 and 041.2 |
|                                      | Bacteraemic pneumonia: pneumococcal-unspecific                                                     | 038.0<br>038.9<br>790.7                               |
| AOM                                  |                                                                                                    | 382.x                                                 |

AOM: acute otitis media; ICD-9-CM: International Classification of Diseases, Ninth Revision, Clinical Modification;  
IPD: invasive pneumococcal disease.

**Figure S1.** Age-stratified annual incidence of (A) unspecified pneumonia and (B) pneumococcal pneumonia in adolescents and adults  $\geq 15$  years of age following the introduction of PCV13 in Liguria, Italy (2012–2018)

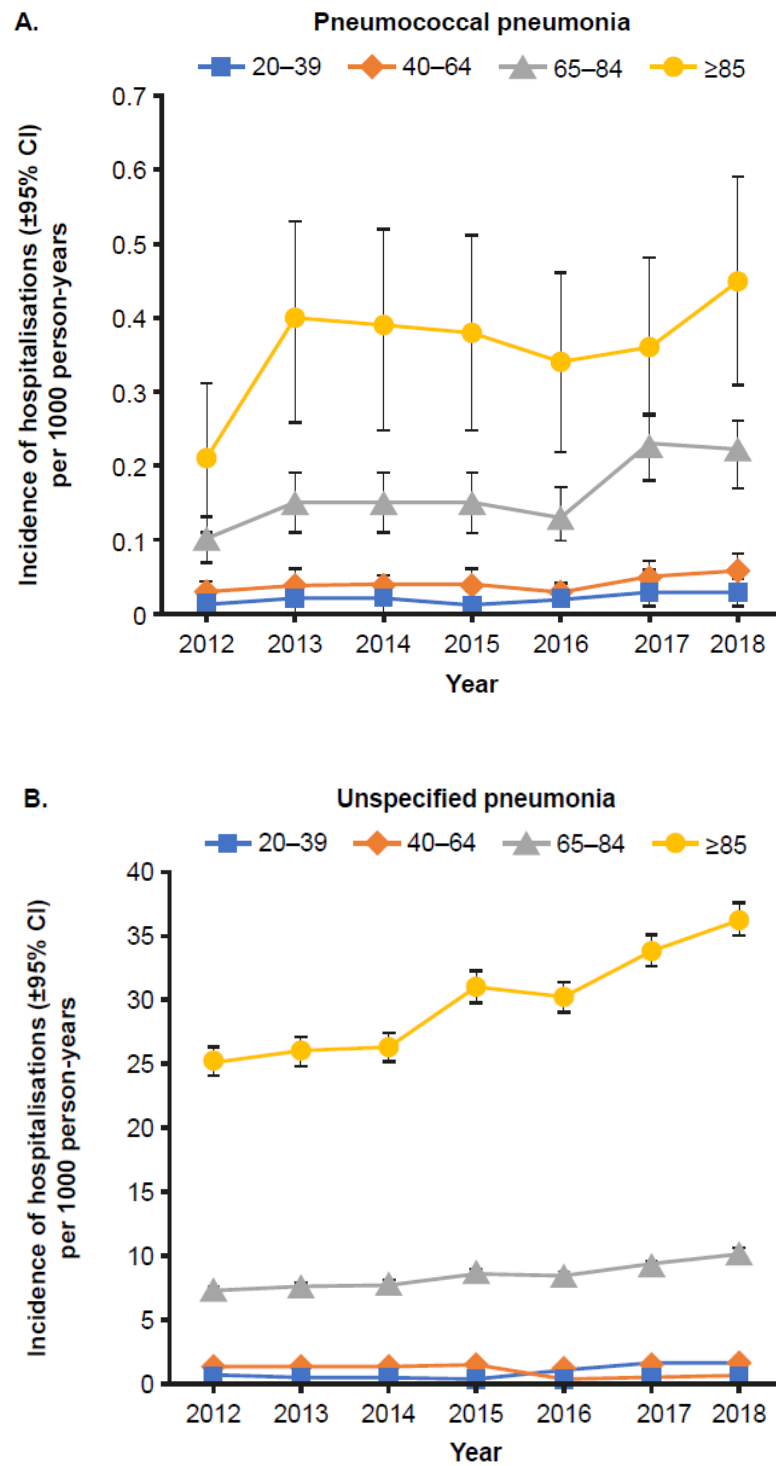

CI: confidence interval; PCV13: 13-valent pneumococcal conjugate vaccine.

**Figure S2.** Age-stratified annual incidence of IPD in adolescents and adults  $\geq 15$  years of age following the introduction of PCV13 in Liguria, Italy (2012–2018)

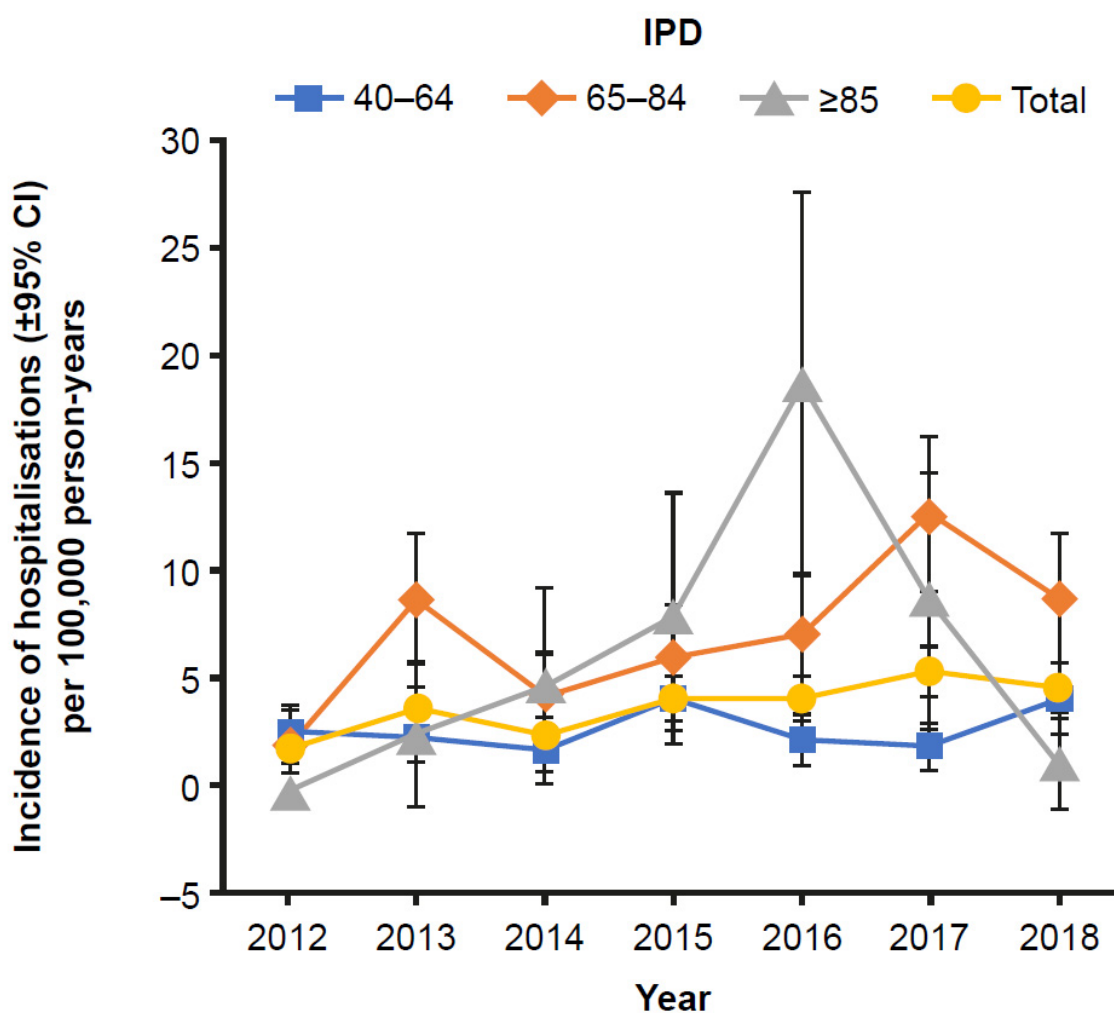

CI: confidence interval; IPD: invasive pneumococcal disease; PCV13: 13-valent pneumococcal conjugate vaccine.
